# Supplementary material for: The cost-effectiveness of a 20% price discount on fruit, vegetables, diet drinks and water, trialled in remote Australia to improve Indigenous health
Source: PubMed Central journal article supplement (PMC6160015; doi:10.1371/journal.pone.0204005), 2018-09-27
Supplement: pone.0204005.s001.pdf [file pone.0204005.s001.pdf]

|    | A                  | B   | C                 | D           | E                         | F                        | G                        | H                 | I           | J                  |
|----|--------------------|-----|-------------------|-------------|---------------------------|--------------------------|--------------------------|-------------------|-------------|--------------------|
| 1  | <b>DATA INPUTS</b> |     |                   |             |                           |                          |                          |                   |             |                    |
| 2  |                    |     | not available     | 2011 remote | ABS remote groups 2010-12 |                          |                          |                   |             |                    |
| 3  |                    |     | <b>Population</b> |             | <b>Mortality</b>          | <b>Incidence</b>         |                          |                   |             |                    |
| 4  | sex                | age | 1-year            | 5-year      | mortality rate            | I20-I25: Ischaemic heart | I60-I69: Cerebrovascular | E11,E14: Diabetes | C50: Breast | C18-20: Colorectum |
| 5  | male               | 0   |                   |             | 0.01131                   | 0.00000                  | 0.00000                  | 0.000892          | 0           | 0                  |
| 6  | male               | 1   |                   |             | 0.00193                   | 0.00000                  | 0.00000                  | 0.000882          | 0           | 0                  |
| 7  | male               | 2   |                   | 7813        | 0.00193                   | 0.00000                  | 0.00000                  | 0.000872          | 0           | 0                  |
| 8  | male               | 3   |                   |             | 0.00193                   | 0.00000                  | 0.00001                  | 0.000862          | 0           | 0                  |
| 9  | male               | 4   |                   |             | 0.00193                   | 0.00000                  | 0.00001                  | 0.000853          | 0           | 0                  |
| 10 | male               | 5   |                   |             | 0.00149                   | 0.00000                  | 0.00001                  | 0.000848          | 0           | 0                  |
| 11 | male               | 6   |                   |             | 0.00149                   | 0.00000                  | 0.00001                  | 0.000849          | 0           | 1.2723E-07         |
| 12 | male               | 7   |                   | 7457        | 0.00149                   | 0.00000                  | 0.00000                  | 0.000857          | 0           | 2.9694E-07         |
| 13 | male               | 8   |                   |             | 0.00149                   | 0.00000                  | 0.00000                  | 0.000878          | 0           | 4.7953E-07         |
| 14 | male               | 9   |                   |             | 0.00149                   | 0.00000                  | 0.00000                  | 0.000927          | 0           | 6.4539E-07         |
| 15 | male               | 10  |                   |             | 0.00150                   | 0.00000                  | 0.00000                  | 0.001022          | 0           | 7.6493E-07         |
| 16 | male               | 11  |                   |             | 0.00150                   | 0.00000                  | 0.00000                  | 0.001181          | 0           | 8.2365E-07         |
| 17 | male               | 12  |                   | 7216        | 0.00150                   | 0.00001                  | 0.00000                  | 0.001422          | 0           | 8.676E-07          |
| 18 | male               | 13  |                   |             | 0.00150                   | 0.00003                  | 0.00005                  | 0.001758          | 0           | 9.5796E-07         |
| 19 | male               | 14  |                   |             | 0.00150                   | 0.00006                  | 0.00012                  | 0.002184          | 0           | 1.1559E-06         |
| 20 | male               | 15  |                   |             | 0.00786                   | 0.00009                  | 0.00020                  | 0.002688          | 0           | 1.5226E-06         |
| 21 | male               | 16  |                   |             | 0.00786                   | 0.00012                  | 0.00027                  | 0.003261          | 0           | 2.0995E-06         |
| 22 | male               | 17  |                   | 6406        | 0.00786                   | 0.00014                  | 0.00031                  | 0.003891          | 0           | 2.8501E-06         |
| 23 | male               | 18  |                   |             | 0.00786                   | 0.00016                  | 0.00034                  | 0.004572          | 0           | 3.7179E-06         |
| 24 | male               | 19  |                   |             | 0.00786                   | 0.00017                  | 0.00034                  | 0.005306          | 0           | 4.6466E-06         |
| 25 | male               | 20  |                   |             | 0.01294                   | 0.00018                  | 0.00033                  | 0.006101          | 0           | 5.5799E-06         |
| 26 | male               | 21  |                   |             | 0.01294                   | 0.00018                  | 0.00032                  | 0.006963          | 0           | 6.4794E-06         |
| 27 | male               | 22  |                   | 6412        | 0.01294                   | 0.00017                  | 0.00031                  | 0.007898          | 0           | 7.3789E-06         |
| 28 | male               | 23  |                   |             | 0.01294                   | 0.00018                  | 0.00032                  | 0.008913          | 0           | 8.33E-06           |
| 29 | male               | 24  |                   |             | 0.01294                   | 0.00020                  | 0.00034                  | 0.010023          | 0           | 9.3844E-06         |
| 30 | male               | 25  |                   |             | 0.01329                   | 0.00029                  | 0.00035                  | 0.011238          | 0           | 1.0594E-05         |
| 31 | male               | 26  |                   |             | 0.01329                   | 0.00046                  | 0.00035                  | 0.012574          | 0           | 1.2031E-05         |
| 32 | male               | 27  |                   | 5539        | 0.01329                   | 0.00074                  | 0.00031                  | 0.014042          | 0           | 1.3851E-05         |
| 33 | male               | 28  |                   |             | 0.01329                   | 0.00114                  | 0.00025                  | 0.015644          | 0           | 1.6231E-05         |
| 34 | male               | 29  |                   |             | 0.01329                   | 0.00160                  | 0.00018                  | 0.017326          | 0           | 1.9347E-05         |
| 35 | male               | 30  |                   |             | 0.02096                   | 0.00203                  | 0.00014                  | 0.01902           | 0           | 2.3376E-05         |
| 36 | male               | 31  |                   |             | 0.02096                   | 0.00235                  | 0.00018                  | 0.02066           | 0           | 2.8376E-05         |
| 37 | male               | 32  |                   | 4758        | 0.02096                   | 0.00246                  | 0.00031                  | 0.022179          | 0           | 3.3937E-05         |
| 38 | male               | 33  |                   |             | 0.02096                   | 0.00232                  | 0.00058                  | 0.023536          | 0           | 3.9532E-05         |
| 39 | male               | 34  |                   |             | 0.02096                   | 0.00204                  | 0.00092                  | 0.024795          | 0           | 4.4632E-05         |
| 40 | male               | 35  |                   |             | 0.02666                   | 0.00177                  | 0.00129                  | 0.026045          | 0           | 4.871E-05          |
| 41 | male               | 36  |                   |             | 0.02666                   | 0.00167                  | 0.00163                  | 0.027377          | 0           | 5.157E-05          |
| 42 | male               | 37  |                   | 4519        | 0.02666                   | 0.00189                  | 0.00188                  | 0.028881          | 0           | 5.4335E-05         |
| 43 | male               | 38  |                   |             | 0.02666                   | 0.00252                  | 0.00200                  | 0.030611          | 0           | 5.8464E-05         |
| 44 | male               | 39  |                   |             | 0.02666                   | 0.00350                  | 0.00202                  | 0.032479          | 0           | 6.5412E-05         |
| 45 | male               | 40  |                   |             | 0.03837                   | 0.00469                  | 0.00198                  | 0.034364          | 0           | 7.6635E-05         |
| 46 | male               | 41  |                   |             | 0.03837                   | 0.00597                  | 0.00192                  | 0.036141          | 0           | 9.3072E-05         |
| 47 | male               | 42  |                   | 4139        | 0.03837                   | 0.00722                  | 0.00188                  | 0.037689          | 0           | 0.00011359         |
| 48 | male               | 43  |                   |             | 0.03837                   | 0.00834                  | 0.00191                  | 0.038911          | 0           | 0.00013655         |
| 49 | male               | 44  |                   |             | 0.03837                   | 0.00932                  | 0.00196                  | 0.039822          | 0           | 0.00016031         |
| 50 | male               | 45  |                   |             | 0.04737                   | 0.01016                  | 0.00200                  | 0.040462          | 0           | 0.0001832          |
| 51 | male               | 46  |                   |             | 0.04737                   | 0.01088                  | 0.00199                  | 0.040872          | 0           | 0.00020445         |
| 52 | male               | 47  |                   | 3538        | 0.04737                   | 0.01150                  | 0.00188                  | 0.041094          | 0           | 0.00022674         |
| 53 | male               | 48  |                   |             | 0.04737                   | 0.01202                  | 0.00167                  | 0.041173          | 0           | 0.00025359         |
| 54 | male               | 49  |                   |             | 0.04737                   | 0.01250                  | 0.00144                  | 0.041183          | 0           | 0.00028854         |
| 55 | male               | 50  |                   |             | 0.06400                   | 0.01298                  | 0.00132                  | 0.0412            | 0           | 0.00033512         |
| 56 | male               | 51  |                   |             | 0.06400                   | 0.01350                  | 0.00143                  | 0.041303          | 0           | 0.00039551         |
| 57 | male               | 52  |                   | 2856        | 0.06400                   | 0.01411                  | 0.00188                  | 0.04157           | 0           | 0.00046647         |
| 58 | male               | 53  |                   |             | 0.06400                   | 0.01485                  | 0.00276                  | 0.042044          | 0           | 0.00054341         |
| 59 | male               | 54  |                   |             | 0.06400                   | 0.01567                  | 0.00392                  | 0.042632          | 0           | 0.00062173         |

|     | A      | B   | C                 | D           | E                         | F                                 | G                                 | H                 | I           | J                  |
|-----|--------|-----|-------------------|-------------|---------------------------|-----------------------------------|-----------------------------------|-------------------|-------------|--------------------|
| 60  | male   | 55  |                   |             | 0.08815                   | 0.01653                           | 0.00515                           | 0.043206          | 0           | 0.00069684         |
| 61  | male   | 56  |                   |             | 0.08815                   | 0.01736                           | 0.00626                           | 0.043639          | 0           | 0.00076567         |
| 62  | male   | 57  |                   | 2187        | 0.08815                   | 0.01812                           | 0.00707                           | 0.043804          | 0           | 0.00083126         |
| 63  | male   | 58  |                   |             | 0.08815                   | 0.01878                           | 0.00742                           | 0.043619          | 0           | 0.00089816         |
| 64  | male   | 59  |                   |             | 0.08815                   | 0.01936                           | 0.00743                           | 0.043192          | 0           | 0.00097095         |
| 65  | male   | 60  |                   |             | 0.12003                   | 0.01991                           | 0.00727                           | 0.042677          | 0           | 0.00105418         |
| 66  | male   | 61  |                   |             | 0.12003                   | 0.02050                           | 0.00709                           | 0.04223           | 0           | 0.00115115         |
| 67  | male   | 62  |                   | 1384        | 0.12003                   | 0.02118                           | 0.00707                           | 0.042004          | 0           | 0.00126006         |
| 68  | male   | 63  |                   |             | 0.12003                   | 0.02197                           | 0.00732                           | 0.042096          | 0           | 0.00137784         |
| 69  | male   | 64  |                   |             | 0.12003                   | 0.02283                           | 0.00777                           | 0.042375          | 0           | 0.00150144         |
| 70  | male   | 65  |                   |             | 0.15586                   | 0.02367                           | 0.00829                           | 0.04265           | 0           | 0.00162779         |
| 71  | male   | 66  |                   |             | 0.15586                   | 0.02444                           | 0.00878                           | 0.042732          | 0           | 0.00175401         |
| 72  | male   | 67  |                   | 962         | 0.15586                   | 0.02505                           | 0.00911                           | 0.042431          | 0           | 0.00187792         |
| 73  | male   | 68  |                   |             | 0.15586                   | 0.02546                           | 0.00920                           | 0.04162           | 0           | 0.00199754         |
| 74  | male   | 69  |                   |             | 0.15586                   | 0.02568                           | 0.00912                           | 0.040425          | 0           | 0.00211089         |
| 75  | male   | 70  |                   |             | 0.22841                   | 0.02577                           | 0.00900                           | 0.039033          | 0           | 0.00221597         |
| 76  | male   | 71  |                   |             | 0.22841                   | 0.02576                           | 0.00896                           | 0.037632          | 0           | 0.00231153         |
| 77  | male   | 72  |                   | 521         | 0.22841                   | 0.02569                           | 0.00911                           | 0.036412          | 0           | 0.00239924         |
| 78  | male   | 73  |                   |             | 0.22841                   | 0.02562                           | 0.00953                           | 0.035498          | 0           | 0.00248146         |
| 79  | male   | 74  |                   |             | 0.22841                   | 0.02556                           | 0.01015                           | 0.034774          | 0           | 0.0025606          |
| 80  | male   | 75  |                   |             | 0.28687                   | 0.02553                           | 0.01085                           | 0.034061          | 0           | 0.00263904         |
| 81  | male   | 76  |                   |             | 0.28687                   | 0.02555                           | 0.01151                           | 0.033183          | 0           | 0.0027179          |
| 82  | male   | 77  |                   | 483         | 0.28687                   | 0.02566                           | 0.01202                           | 0.031961          | 0           | 0.00279322         |
| 83  | male   | 78  |                   |             | 0.28687                   | 0.02585                           | 0.01228                           | 0.030289          | 0           | 0.00285979         |
| 84  | male   | 79  |                   |             | 0.28687                   | 0.02610                           | 0.01235                           | 0.02835           | 0           | 0.00291236         |
| 85  | male   | 80  |                   |             | 0.35135                   | 0.02636                           | 0.01228                           | 0.026398          | 0           | 0.00294572         |
| 86  | male   | 81  |                   |             | 0.35135                   | 0.02661                           | 0.01215                           | 0.024688          | 0           | 0.00295634         |
| 87  | male   | 82  |                   |             | 0.35135                   | 0.02679                           | 0.01202                           | 0.023474          | 0           | 0.0029474          |
| 88  | male   | 83  |                   |             | 0.35135                   | 0.02688                           | 0.01193                           | 0.022952          | 0           | 0.00292381         |
| 89  | male   | 84  |                   |             | 0.35135                   | 0.02689                           | 0.01191                           | 0.023087          | 0           | 0.00289044         |
| 90  | male   | 85  |                   |             | 1.000000                  | 0.02684                           | 0.01192                           | 0.023784          | 0           | 0.00285218         |
| 91  | male   | 86  |                   |             | 1.000000                  | 0.02684                           | 0.01192                           | 0.024951          | 0           | 0.00285218         |
| 92  | male   | 87  |                   |             | 1.000000                  | 0.02684                           | 0.01192                           | 0.026493          | 0           | 0.00285218         |
| 93  | male   | 88  |                   |             | 1.000000                  | 0.02684                           | 0.01192                           | 0.028316          | 0           | 0.00285218         |
| 94  | male   | 89  |                   |             | 1.000000                  | 0.02684                           | 0.01192                           | 0.030327          | 0           | 0.00285218         |
| 95  | male   | 90  |                   |             | 1.000000                  | 0.02684                           | 0.01192                           | 0.032432          | 0           | 0.00285218         |
| 96  | male   | 91  |                   |             | 1.000000                  | 0.02684                           | 0.01192                           | 0.032432          | 0           | 0.00285218         |
| 97  | male   | 92  |                   |             | 1.000000                  | 0.02684                           | 0.01192                           | 0.032432          | 0           | 0.00285218         |
| 98  | male   | 93  |                   |             | 1.000000                  | 0.02684                           | 0.01192                           | 0.032432          | 0           | 0.00285218         |
| 99  | male   | 94  |                   |             | 1.000000                  | 0.02684                           | 0.01192                           | 0.032432          | 0           | 0.00285218         |
| 100 | male   | 95  |                   |             | 1.000000                  | 0.02684                           | 0.01192                           | 0.032432          | 0           | 0.00285218         |
| 101 | male   | 96  |                   |             | 1.000000                  | 0.02684                           | 0.01192                           | 0.032432          | 0           | 0.00285218         |
| 102 | male   | 97  |                   |             | 1.000000                  | 0.02684                           | 0.01192                           | 0.032432          | 0           | 0.00285218         |
| 103 | male   | 98  |                   |             | 1.000000                  | 0.02684                           | 0.01192                           | 0.032432          | 0           | 0.00285218         |
| 104 | male   | 99  |                   |             | 1.000000                  | 0.02684                           | 0.01192                           | 0.032432          | 0           | 0.00285218         |
| 105 | male   | 100 |                   |             | 1.000000                  | 0.02684                           | 0.01192                           | 0.032432          | 0           | 0.00285218         |
| 106 |        |     | not available     | 2011 remote | ABS remote groups 2010-12 |                                   |                                   |                   |             |                    |
| 107 |        |     | <b>Population</b> |             | <b>Mortality</b>          | <b>Incidence</b>                  |                                   |                   |             |                    |
| 108 | sex    | age | 1-year            | 5-year      | mortality rate            | I20-I25: Ischaemic heart diseases | I60-I69: Cerebrovascular diseases | E11,E14: Diabetes | C50: Breast | C18-20: Colorectum |
| 109 | female | 0   |                   |             | 0.00930                   | 0.00000                           | 0.00000                           | 0.00047           | 0           | 0                  |
| 110 | female | 1   |                   |             | 0.00189                   | 0.00001                           | 0.00000                           | 0.000496          | 0           | 0                  |
| 111 | female | 2   |                   | 7516        | 0.00189                   | 0.00000                           | 0.00000                           | 0.000537          | 0           | 4.2145E-07         |
| 112 | female | 3   |                   |             | 0.00189                   | 0.00000                           | 0.00001                           | 0.0006            | 0           | 7.641E-07          |
| 113 | female | 4   |                   |             | 0.00189                   | 0.00000                           | 0.00002                           | 0.000673          | 0           | 9.4914E-07         |
| 114 | female | 5   |                   |             | 0.00125                   | 0.00000                           | 0.00002                           | 0.00074           | 0           | 8.9777E-07         |
| 115 | female | 6   |                   |             | 0.00125                   | 0.00000                           | 0.00002                           | 0.000784          | 6.69E-08    | 5.765E-07          |
| 116 | female | 7   |                   | 7237        | 0.00125                   | 0.00003                           | 0.00000                           | 0.000788          | 1.37E-07    | 1.3306E-07         |
| 117 | female | 8   |                   |             | 0.00125                   | 0.00008                           | 0.00000                           | 0.000745          | 1.74E-07    | 0                  |

|     | A      | B  | C | D    | E       | F       | G       | H        | I        | J          |
|-----|--------|----|---|------|---------|---------|---------|----------|----------|------------|
| 118 | female | 9  |   |      | 0.00125 | 0.00014 | 0.00000 | 0.000679 | 1.4E-07  | 0          |
| 119 | female | 10 |   |      | 0.00140 | 0.00020 | 0.00000 | 0.000626 | 0        | 0          |
| 120 | female | 11 |   |      | 0.00140 | 0.00025 | 0.00000 | 0.00062  | 0        | 9.2474E-07 |
| 121 | female | 12 |   | 6665 | 0.00140 | 0.00026 | 0.00000 | 0.000695 | 0        | 2.2518E-06 |
| 122 | female | 13 |   |      | 0.00140 | 0.00024 | 0.00010 | 0.000881 | 0        | 3.7335E-06 |
| 123 | female | 14 |   |      | 0.00140 | 0.00022 | 0.00022 | 0.001182 | 0        | 5.1222E-06 |
| 124 | female | 15 |   |      | 0.00365 | 0.00024 | 0.00035 | 0.001595 | 0        | 6.1702E-06 |
| 125 | female | 16 |   |      | 0.00365 | 0.00033 | 0.00048 | 0.002119 | 9.52E-07 | 6.6998E-06 |
| 126 | female | 17 |   | 5924 | 0.00365 | 0.00052 | 0.00057 | 0.002753 | 1.93E-06 | 6.8119E-06 |
| 127 | female | 18 |   |      | 0.00365 | 0.00086 | 0.00061 | 0.003495 | 2.44E-06 | 6.6777E-06 |
| 128 | female | 19 |   |      | 0.00365 | 0.00128 | 0.00062 | 0.004342 | 1.96E-06 | 6.468E-06  |
| 129 | female | 20 |   |      | 0.00527 | 0.00173 | 0.00060 | 0.005291 | 0        | 6.3538E-06 |
| 130 | female | 21 |   |      | 0.00527 | 0.00214 | 0.00058 | 0.006342 | 0        | 6.4807E-06 |
| 131 | female | 22 |   | 6169 | 0.00527 | 0.00247 | 0.00057 | 0.00749  | 0        | 6.8921E-06 |
| 132 | female | 23 |   |      | 0.00527 | 0.00265 | 0.00058 | 0.008738 | 0        | 7.6065E-06 |
| 133 | female | 24 |   |      | 0.00527 | 0.00272 | 0.00059 | 0.010105 | 0        | 8.6421E-06 |
| 134 | female | 25 |   |      | 0.00882 | 0.00271 | 0.00061 | 0.011612 | 0        | 1.0017E-05 |
| 135 | female | 26 |   |      | 0.00882 | 0.00264 | 0.00061 | 0.013281 | 1.41E-05 | 1.176E-05  |
| 136 | female | 27 |   | 5729 | 0.00882 | 0.00257 | 0.00057 | 0.015136 | 3.33E-05 | 1.3944E-05 |
| 137 | female | 28 |   |      | 0.00882 | 0.00250 | 0.00049 | 0.017183 | 5.56E-05 | 1.6649E-05 |
| 138 | female | 29 |   |      | 0.00882 | 0.00245 | 0.00040 | 0.019366 | 7.85E-05 | 1.996E-05  |
| 139 | female | 30 |   |      | 0.00875 | 0.00242 | 0.00036 | 0.021614 | 0.0001   | 2.3958E-05 |
| 140 | female | 31 |   |      | 0.00875 | 0.00240 | 0.00040 | 0.023856 | 0.000119 | 2.8672E-05 |
| 141 | female | 32 |   | 4996 | 0.00875 | 0.00238 | 0.00057 | 0.02602  | 0.000136 | 3.3913E-05 |
| 142 | female | 33 |   |      | 0.00875 | 0.00237 | 0.00089 | 0.028047 | 0.000153 | 3.9439E-05 |
| 143 | female | 34 |   |      | 0.00875 | 0.00239 | 0.00131 | 0.029919 | 0.000174 | 4.5006E-05 |
| 144 | female | 35 |   |      | 0.01608 | 0.00246 | 0.00177 | 0.031631 | 0.0002   | 5.0372E-05 |
| 145 | female | 36 |   |      | 0.01608 | 0.00260 | 0.00218 | 0.033176 | 0.000233 | 5.5505E-05 |
| 146 | female | 37 |   | 4692 | 0.01608 | 0.00284 | 0.00249 | 0.034549 | 0.000271 | 6.1215E-05 |
| 147 | female | 38 |   |      | 0.01608 | 0.00319 | 0.00265 | 0.03576  | 0.000313 | 6.8522E-05 |
| 148 | female | 39 |   |      | 0.01608 | 0.00363 | 0.00267 | 0.036881 | 0.000357 | 7.8446E-05 |
| 149 | female | 40 |   |      | 0.02543 | 0.00413 | 0.00262 | 0.038001 | 0.0004   | 9.2007E-05 |
| 150 | female | 41 |   |      | 0.02543 | 0.00467 | 0.00254 | 0.039208 | 0.000442 | 0.00010979 |
| 151 | female | 42 |   | 4435 | 0.02543 | 0.00521 | 0.00249 | 0.040592 | 0.000482 | 0.00013061 |
| 152 | female | 43 |   |      | 0.02543 | 0.00574 | 0.00250 | 0.042194 | 0.000522 | 0.00015287 |
| 153 | female | 44 |   |      | 0.02543 | 0.00626 | 0.00255 | 0.043869 | 0.000561 | 0.00017496 |
| 154 | female | 45 |   |      | 0.03117 | 0.00681 | 0.00259 | 0.045425 | 0.0006   | 0.00019526 |
| 155 | female | 46 |   |      | 0.03117 | 0.00740 | 0.00258 | 0.046672 | 0.00064  | 0.00021274 |
| 156 | female | 47 |   | 3612 | 0.03117 | 0.00806 | 0.00249 | 0.047418 | 0.00068  | 0.00022869 |
| 157 | female | 48 |   |      | 0.03117 | 0.00880 | 0.00230 | 0.047543 | 0.000721 | 0.00024498 |
| 158 | female | 49 |   |      | 0.03117 | 0.00958 | 0.00209 | 0.047214 | 0.000761 | 0.00026348 |
| 159 | female | 50 |   |      | 0.04659 | 0.01035 | 0.00198 | 0.046669 | 0.0008   | 0.00028606 |
| 160 | female | 51 |   |      | 0.04659 | 0.01106 | 0.00208 | 0.046146 | 0.000838 | 0.0003143  |
| 161 | female | 52 |   | 3175 | 0.04659 | 0.01167 | 0.00249 | 0.045884 | 0.000876 | 0.00034861 |
| 162 | female | 53 |   |      | 0.04659 | 0.01215 | 0.00329 | 0.046041 | 0.000915 | 0.00038914 |
| 163 | female | 54 |   |      | 0.04659 | 0.01256 | 0.00432 | 0.046463 | 0.000956 | 0.000436   |
| 164 | female | 55 |   |      | 0.06651 | 0.01301 | 0.00539 | 0.046916 | 0.001    | 0.00048933 |
| 165 | female | 56 |   |      | 0.06651 | 0.01358 | 0.00632 | 0.047165 | 0.001047 | 0.000549   |
| 166 | female | 57 |   | 2321 | 0.06651 | 0.01438 | 0.00691 | 0.046977 | 0.001094 | 0.00061391 |
| 167 | female | 58 |   |      | 0.06651 | 0.01545 | 0.00704 | 0.046196 | 0.001138 | 0.0006827  |
| 168 | female | 59 |   |      | 0.06651 | 0.01672 | 0.00688 | 0.044971 | 0.001174 | 0.00075399 |
| 169 | female | 60 |   |      | 0.07709 | 0.01808 | 0.00665 | 0.043531 | 0.0012   | 0.00082643 |
| 170 | female | 61 |   |      | 0.07709 | 0.01941 | 0.00658 | 0.042105 | 0.001213 | 0.00089883 |
| 171 | female | 62 |   | 1557 | 0.07709 | 0.02059 | 0.00691 | 0.04092  | 0.001215 | 0.00097065 |
| 172 | female | 63 |   |      | 0.07709 | 0.02154 | 0.00779 | 0.040149 | 0.001211 | 0.00104154 |
| 173 | female | 64 |   |      | 0.07709 | 0.02224 | 0.00905 | 0.03974  | 0.001204 | 0.00111112 |
| 174 | female | 65 |   |      | 0.10885 | 0.02270 | 0.01043 | 0.039587 | 0.0012   | 0.00117904 |
| 175 | female | 66 |   |      | 0.10885 | 0.02293 | 0.01169 | 0.039582 | 0.001201 | 0.00124554 |
| 176 | female | 67 |   | 1135 | 0.10885 | 0.02294 | 0.01258 | 0.039618 | 0.001204 | 0.00131325 |
| 177 | female | 68 |   |      | 0.10885 | 0.02275 | 0.01292 | 0.039616 | 0.001207 | 0.0013854  |
| 178 | female | 69 |   |      | 0.10885 | 0.02242 | 0.01286 | 0.039603 | 0.001207 | 0.00146524 |
| 179 | female | 70 |   |      | 0.18178 | 0.02202 | 0.01263 | 0.039633 | 0.0012   | 0.00155599 |
| 180 | female | 71 |   |      | 0.18178 | 0.02162 | 0.01246 | 0.039762 | 0.001185 | 0.00165899 |
| 181 | female | 72 |   | 788  | 0.18178 | 0.02129 | 0.01258 | 0.040044 | 0.001163 | 0.00176796 |

|     | A      | B   | C | D   | E       | F       | G       | H        | I        | J          |
|-----|--------|-----|---|-----|---------|---------|---------|----------|----------|------------|
| 182 | female | 73  |   |     | 0.18178 | 0.02109 | 0.01315 | 0.040491 | 0.001139 | 0.00187472 |
| 183 | female | 74  |   |     | 0.18178 | 0.02104 | 0.01405 | 0.04094  | 0.001117 | 0.00197109 |
| 184 | female | 75  |   |     | 0.23437 | 0.02115 | 0.01510 | 0.041185 | 0.0011   | 0.00204889 |
| 185 | female | 76  |   |     | 0.23437 | 0.02145 | 0.01610 | 0.041019 | 0.001091 | 0.00210267 |
| 186 | female | 77  |   | 856 | 0.23437 | 0.02194 | 0.01688 | 0.040237 | 0.001089 | 0.00213783 |
| 187 | female | 78  |   |     | 0.23437 | 0.02263 | 0.01730 | 0.038715 | 0.001091 | 0.00216252 |
| 188 | female | 79  |   |     | 0.23437 | 0.02346 | 0.01740 | 0.036666 | 0.001095 | 0.00218488 |
| 189 | female | 80  |   |     | 0.32848 | 0.02435 | 0.01730 | 0.034387 | 0.0011   | 0.00221303 |
| 190 | female | 81  |   |     | 0.32848 | 0.02525 | 0.01709 | 0.032174 | 0.001103 | 0.00225331 |
| 191 | female | 82  |   |     | 0.32848 | 0.02608 | 0.01688 | 0.030324 | 0.001104 | 0.00230473 |
| 192 | female | 83  |   |     | 0.32848 | 0.02680 | 0.01676 | 0.02907  | 0.001103 | 0.00236452 |
| 193 | female | 84  |   |     | 0.32848 | 0.02740 | 0.01672 | 0.028392 | 0.001102 | 0.00242989 |
| 194 | female | 85  |   |     | 1.00000 | 0.02792 | 0.01674 | 0.028209 | 0.0011   | 0.00249804 |
| 195 | female | 86  |   |     | 1.00000 | 0.02792 | 0.01674 | 0.028438 | 0.0011   | 0.00249804 |
| 196 | female | 87  |   |     | 1.00000 | 0.02792 | 0.01674 | 0.028996 | 0.0011   | 0.00249804 |
| 197 | female | 88  |   |     | 1.00000 | 0.02792 | 0.01674 | 0.029802 | 0.0011   | 0.00249804 |
| 198 | female | 89  |   |     | 1.00000 | 0.02792 | 0.01674 | 0.030772 | 0.0011   | 0.00249804 |
| 199 | female | 90  |   |     | 1.00000 | 0.02792 | 0.01674 | 0.031825 | 0.0011   | 0.00249804 |
| 200 | female | 91  |   |     | 1.00000 | 0.02792 | 0.01674 | 0.031825 | 0.0011   | 0.00249804 |
| 201 | female | 92  |   |     | 1.00000 | 0.02792 | 0.01674 | 0.031825 | 0.0011   | 0.00249804 |
| 202 | female | 93  |   |     | 1.00000 | 0.02792 | 0.01674 | 0.031825 | 0.0011   | 0.00249804 |
| 203 | female | 94  |   |     | 1.00000 | 0.02792 | 0.01674 | 0.031825 | 0.0011   | 0.00249804 |
| 204 | female | 95  |   |     | 1.00000 | 0.02792 | 0.01674 | 0.031825 | 0.0011   | 0.00249804 |
| 205 | female | 96  |   |     | 1.00000 | 0.02792 | 0.01674 | 0.031825 | 0.0011   | 0.00249804 |
| 206 | female | 97  |   |     | 1.00000 | 0.02792 | 0.01674 | 0.031825 | 0.0011   | 0.00249804 |
| 207 | female | 98  |   |     | 1.00000 | 0.02792 | 0.01674 | 0.031825 | 0.0011   | 0.00249804 |
| 208 | female | 99  |   |     | 1.00000 | 0.02792 | 0.01674 | 0.031825 | 0.0011   | 0.00249804 |
| 209 | female | 100 |   |     | 1.00000 | 0.02792 | 0.01674 | 0.031825 | 0.0011   | 0.00249804 |

|    | K                           | L                           | M                    | N              | O                     | P                            | Q                           | R                    | S              | T                     |
|----|-----------------------------|-----------------------------|----------------------|----------------|-----------------------|------------------------------|-----------------------------|----------------------|----------------|-----------------------|
| 1  |                             |                             |                      |                |                       |                              |                             |                      |                |                       |
| 2  |                             |                             |                      |                |                       | From Indigenous BOD (remote) |                             |                      |                |                       |
| 3  | <b>Case fatality</b>        |                             |                      |                |                       | <b>Prevalence (initial)</b>  |                             |                      |                |                       |
| 4  | I20-I25:<br>Ischaemic heart | I60-I69:<br>Cerebrovascular | E11,E14:<br>Diabetes | C50:<br>Breast | C18-20:<br>Colorectum | I20-I25:<br>Ischaemic heart  | I60-I69:<br>Cerebrovascular | E11,E14:<br>Diabetes | C50:<br>Breast | C18-20:<br>Colorectum |
| 5  | 0.0000                      | 0.0066                      | 0                    | 0              | 0                     | 0                            | 2.13E-08                    | 0.000196             | 0              | 0                     |
| 6  | 0.0000                      | 0.0064                      | 4.31E-09             | 0              | 0                     | 0                            | 1.29E-08                    | 0.001159             | 0              | 0                     |
| 7  | 0.0000                      | 0.0057                      | 0                    | 0              | 0                     | 0                            | 1.29E-08                    | 0.001159             | 0              | 0                     |
| 8  | 0.0000                      | 0.0050                      | -1.8E-08             | 0              | 0                     | 0                            | 1.29E-08                    | 0.001159             | 0              | 0                     |
| 9  | 0.0000                      | 0.0043                      | -4E-08               | 0              | 0                     | 0                            | 1.29E-08                    | 0.001159             | 0              | 0                     |
| 10 | 0.0000                      | 0.0036                      | -5.3E-08             | 0              | 0                     | 0                            | 4.08E-08                    | 0.002844             | 0              | 0                     |
| 11 | 0.0000                      | 0.0030                      | -4.4E-08             | 0              | 3.6835E-07            | 0                            | 4.08E-08                    | 0.002844             | 0              | 0                     |
| 12 | 0.0000                      | 0.0025                      | 0                    | 0              | 7.5424E-07            | 0                            | 4.08E-08                    | 0.002844             | 0              | 0                     |
| 13 | 0.0000                      | 0.0020                      | 8.27E-08             | 0              | 9.5595E-07            | 0                            | 4.08E-08                    | 0.002844             | 0              | 0                     |
| 14 | 0.0000                      | 0.0017                      | 1.69E-07             | 0              | 7.7178E-07            | 0                            | 4.08E-08                    | 0.002844             | 0              | 0                     |
| 15 | 0.0000                      | 0.0014                      | 2.14E-07             | 0              | 0                     | 1.25E-05                     | 7.22E-08                    | 0.005257             | 1.14E-06       | 0                     |
| 16 | 0.0000                      | 0.0012                      | 1.72E-07             | 0              | 0                     | 1.25E-05                     | 7.22E-08                    | 0.005257             | 1.14E-06       | 0                     |
| 17 | 0.0000                      | 0.0012                      | 0                    | 0              | 0                     | 1.25E-05                     | 7.22E-08                    | 0.005257             | 1.14E-06       | 0                     |
| 18 | 0.0000                      | 0.0013                      | -3.1E-07             | 0              | 0                     | 1.25E-05                     | 7.22E-08                    | 0.005257             | 1.14E-06       | 0                     |
| 19 | 0.0000                      | 0.0014                      | -6.4E-07             | 0              | 0                     | 1.25E-05                     | 7.22E-08                    | 0.005257             | 1.14E-06       | 0                     |
| 20 | 0.0000                      | 0.0016                      | -8E-07               | 0              | 0                     | 0.000145                     | 1.11E-07                    | 0.011035             | 3.12E-06       | 0                     |
| 21 | 0.0000                      | 0.0018                      | -6.4E-07             | 0              | 5.2446E-06            | 0.000145                     | 1.11E-07                    | 0.011035             | 3.12E-06       | 0                     |
| 22 | 0.0000                      | 0.0019                      | 0                    | 0              | 1.0647E-05            | 0.000145                     | 1.11E-07                    | 0.011035             | 3.12E-06       | 0                     |
| 23 | 0.0000                      | 0.0019                      | 1.17E-06             | 0              | 1.3427E-05            | 0.000145                     | 1.11E-07                    | 0.011035             | 3.12E-06       | 0                     |
| 24 | 0.0000                      | 0.0019                      | 2.37E-06             | 0              | 1.0805E-05            | 0.000145                     | 1.11E-07                    | 0.011035             | 3.12E-06       | 0                     |
| 25 | 0.0000                      | 0.0017                      | 2.99E-06             | 0              | 0                     | 0.0007892                    | 2.78E-07                    | 0.025357             | 1.01E-05       | 0                     |
| 26 | 0.0000                      | 0.0016                      | 2.41E-06             | 0              | 0                     | 0.0007892                    | 2.78E-07                    | 0.025357             | 1.01E-05       | 0                     |
| 27 | 0.0000                      | 0.0014                      | 0                    | 0              | 0                     | 0.0007892                    | 2.78E-07                    | 0.025357             | 1.01E-05       | 0                     |
| 28 | 0.0000                      | 0.0012                      | -4.4E-06             | 0              | 0                     | 0.0007892                    | 2.78E-07                    | 0.025357             | 1.01E-05       | 0                     |
| 29 | 0.0000                      | 0.0011                      | -8.9E-06             | 0              | 0                     | 0.0007892                    | 2.78E-07                    | 0.025357             | 1.01E-05       | 0                     |
| 30 | 0.0000                      | 0.0010                      | -1.1E-05             | 0              | 0                     | 0.0027449                    | 4.64E-07                    | 0.053076             | 2.23E-05       | 0                     |
| 31 | 0.0000                      | 0.0009                      | -9E-06               | 0              | 7.3056E-05            | 0.0027449                    | 4.64E-07                    | 0.053076             | 2.23E-05       | 0                     |
| 32 | 0.0000                      | 0.0009                      | 0                    | 0              | 0.0001483             | 0.0027449                    | 4.64E-07                    | 0.053076             | 2.23E-05       | 0                     |
| 33 | 0.0001                      | 0.0010                      | 1.79E-05             | 0              | 0.00018702            | 0.0027449                    | 4.64E-07                    | 0.053076             | 2.23E-05       | 0                     |
| 34 | 0.0001                      | 0.0011                      | 4.58E-05             | 0              | 0.0001505             | 0.0027449                    | 4.64E-07                    | 0.053076             | 2.23E-05       | 0                     |
| 35 | 0.0002                      | 0.0013                      | 8.49E-05             | 0              | 0                     | 0.007137                     | 9.02E-07                    | 0.09617              | 4.76E-05       | 0                     |
| 36 | 0.0001                      | 0.0014                      | 0.000136             | 0              | 0                     | 0.007137                     | 9.02E-07                    | 0.09617              | 4.76E-05       | 0                     |
| 37 | 0.0000                      | 0.0014                      | 0.0002               | 0              | 0                     | 0.007137                     | 9.02E-07                    | 0.09617              | 4.76E-05       | 0                     |
| 38 | 0.0000                      | 0.0014                      | 0.000278             | 0              | 0.00027401            | 0.007137                     | 9.02E-07                    | 0.09617              | 4.76E-05       | 0                     |
| 39 | 0.0000                      | 0.0014                      | 0.000368             | 0              | 0.00174234            | 0.007137                     | 9.02E-07                    | 0.09617              | 4.76E-05       | 0                     |
| 40 | 0.0000                      | 0.0018                      | 0.000469             | 0              | 0.0045                | 0.015248                     | 1.58E-06                    | 0.151663             | 0.0001         | 0                     |
| 41 | 0.0004                      | 0.0026                      | 0.00058              | 0              | 0.00880314            | 0.015248                     | 1.58E-06                    | 0.151663             | 0.0001         | 0                     |
| 42 | 0.0017                      | 0.0041                      | 0.0007               | 0              | 0.01449041            | 0.015248                     | 1.58E-06                    | 0.151663             | 0.0001         | 0                     |
| 43 | 0.0039                      | 0.0064                      | 0.000828             | 0              | 0.02129612            | 0.015248                     | 1.58E-06                    | 0.151663             | 0.0001         | 0                     |
| 44 | 0.0067                      | 0.0095                      | 0.000967             | 0              | 0.02895455            | 0.015248                     | 1.58E-06                    | 0.151663             | 0.0001         | 0                     |
| 45 | 0.0099                      | 0.0130                      | 0.001122             | 0              | 0.0372                | 0.0290239                    | 4E-06                       | 0.21323              | 0.000172       | 0                     |
| 46 | 0.0133                      | 0.0168                      | 0.001298             | 0              | 0.0457565             | 0.0290239                    | 4E-06                       | 0.21323              | 0.000172       | 0                     |
| 47 | 0.0165                      | 0.0207                      | 0.0015               | 0              | 0.05430704            | 0.0290239                    | 4E-06                       | 0.21323              | 0.000172       | 0                     |
| 48 | 0.0193                      | 0.0245                      | 0.00173              | 0              | 0.06252432            | 0.0290239                    | 4E-06                       | 0.21323              | 0.000172       | 0                     |
| 49 | 0.0217                      | 0.0280                      | 0.001982             | 0              | 0.07008107            | 0.0290239                    | 4E-06                       | 0.21323              | 0.000172       | 0                     |
| 50 | 0.0235                      | 0.0311                      | 0.00225              | 0              | 0.07665               | 0.0492599                    | 4.35E-06                    | 0.274774             | 0.000366       | 0                     |
| 51 | 0.0247                      | 0.0335                      | 0.002525             | 0              | 0.08197725            | 0.0492599                    | 4.35E-06                    | 0.274774             | 0.000366       | 0                     |
| 52 | 0.0252                      | 0.0353                      | 0.0028               | 0              | 0.08610265            | 0.0492599                    | 4.35E-06                    | 0.274774             | 0.000366       | 0                     |
| 53 | 0.0249                      | 0.0362                      | 0.003068             | 0              | 0.08913941            | 0.0492599                    | 4.35E-06                    | 0.274774             | 0.000366       | 0                     |
| 54 | 0.0242                      | 0.0365                      | 0.003326             | 0              | 0.09120078            | 0.0492599                    | 4.35E-06                    | 0.274774             | 0.000366       | 0                     |
| 55 | 0.0230                      | 0.0362                      | 0.003569             | 0              | 0.0924                | 0.0736713                    | 9.78E-06                    | 0.33139              | 0.000713       | 0                     |
| 56 | 0.0218                      | 0.0357                      | 0.003795             | 0              | 0.09284888            | 0.0736713                    | 9.78E-06                    | 0.33139              | 0.000713       | 0                     |
| 57 | 0.0206                      | 0.0351                      | 0.004                | 0              | 0.09265358            | 0.0736713                    | 9.78E-06                    | 0.33139              | 0.000713       | 0                     |
| 58 | 0.0197                      | 0.0346                      | 0.004184             | 0              | 0.09191884            | 0.0736713                    | 9.78E-06                    | 0.33139              | 0.000713       | 0                     |
| 59 | 0.0191                      | 0.0344                      | 0.004361             | 0              | 0.0907494             | 0.0736713                    | 9.78E-06                    | 0.33139              | 0.000713       | 0                     |

|     | K      | L      | M        | N | O          | P         | Q        | R        | S        | T |
|-----|--------|--------|----------|---|------------|-----------|----------|----------|----------|---|
| 60  | 0.0187 | 0.0344 | 0.004545 | 0 | 0.08925    | 0.0959419 | 1.22E-05 | 0.379958 | 0.001429 | 0 |
| 61  | 0.0184 | 0.0348 | 0.004753 | 0 | 0.08752243 | 0.0959419 | 1.22E-05 | 0.379958 | 0.001429 | 0 |
| 62  | 0.0183 | 0.0357 | 0.005    | 0 | 0.08565664 | 0.0959419 | 1.22E-05 | 0.379958 | 0.001429 | 0 |
| 63  | 0.0184 | 0.0371 | 0.005299 | 0 | 0.08373964 | 0.0959419 | 1.22E-05 | 0.379958 | 0.001429 | 0 |
| 64  | 0.0185 | 0.0388 | 0.005646 | 0 | 0.08185842 | 0.0959419 | 1.22E-05 | 0.379958 | 0.001429 | 0 |
| 65  | 0.0186 | 0.0407 | 0.006033 | 0 | 0.0801     | 0.116313  | 2.18E-05 | 0.418721 | 0.002358 | 0 |
| 66  | 0.0189 | 0.0424 | 0.006454 | 0 | 0.07852981 | 0.116313  | 2.18E-05 | 0.418721 | 0.002358 | 0 |
| 67  | 0.0192 | 0.0439 | 0.0069   | 0 | 0.07712707 | 0.116313  | 2.18E-05 | 0.418721 | 0.002358 | 0 |
| 68  | 0.0195 | 0.0449 | 0.007364 | 0 | 0.07584942 | 0.116313  | 2.18E-05 | 0.418721 | 0.002358 | 0 |
| 69  | 0.0199 | 0.0453 | 0.00783  | 0 | 0.07465451 | 0.116313  | 2.18E-05 | 0.418721 | 0.002358 | 0 |
| 70  | 0.0203 | 0.0452 | 0.008286 | 0 | 0.0735     | 0.1386748 | 2.83E-05 | 0.446749 | 0.00359  | 0 |
| 71  | 0.0209 | 0.0444 | 0.008714 | 0 | 0.07235113 | 0.1386748 | 2.83E-05 | 0.446749 | 0.00359  | 0 |
| 72  | 0.0215 | 0.0431 | 0.0091   | 0 | 0.07120349 | 0.1386748 | 2.83E-05 | 0.446749 | 0.00359  | 0 |
| 73  | 0.0223 | 0.0411 | 0.009431 | 0 | 0.0700603  | 0.1386748 | 2.83E-05 | 0.446749 | 0.00359  | 0 |
| 74  | 0.0232 | 0.0387 | 0.009701 | 0 | 0.06892474 | 0.1386748 | 2.83E-05 | 0.446749 | 0.00359  | 0 |
| 75  | 0.0242 | 0.0358 | 0.009905 | 0 | 0.0678     | 0.1569095 | 3.26E-05 | 0.463411 | 0.004983 | 0 |
| 76  | 0.0254 | 0.0327 | 0.010039 | 0 | 0.06669008 | 0.1569095 | 3.26E-05 | 0.463411 | 0.004983 | 0 |
| 77  | 0.0266 | 0.0295 | 0.0101   | 0 | 0.06560216 | 0.1569095 | 3.26E-05 | 0.463411 | 0.004983 | 0 |
| 78  | 0.0281 | 0.0263 | 0.010085 | 0 | 0.06454419 | 0.1569095 | 3.26E-05 | 0.463411 | 0.004983 | 0 |
| 79  | 0.0296 | 0.0234 | 0.010005 | 0 | 0.06352415 | 0.1569095 | 3.26E-05 | 0.463411 | 0.004983 | 0 |
| 80  | 0.0313 | 0.0209 | 0.009873 | 0 | 0.06255    | 0.1697729 | 4.26E-05 | 0.469189 | 0.006018 | 0 |
| 81  | 0.0332 | 0.0191 | 0.0097   | 0 | 0.06163094 | 0.1697729 | 4.26E-05 | 0.469189 | 0.006018 | 0 |
| 82  | 0.0353 | 0.0182 | 0.0095   | 0 | 0.06078107 | 0.1697729 | 4.26E-05 | 0.469189 | 0.006018 | 0 |
| 83  | 0.0375 | 0.0184 | 0.009286 | 0 | 0.06001574 | 0.1697729 | 4.26E-05 | 0.469189 | 0.006018 | 0 |
| 84  | 0.0401 | 0.0199 | 0.009073 | 0 | 0.05935027 | 0.1697729 | 4.26E-05 | 0.469189 | 0.006018 | 0 |
| 85  | 0.0434 | 0.0225 | 0.008877 | 0 | 0.0588     | 0.1818543 | 4.42E-05 | 0.463825 | 0.006417 | 0 |
| 86  | 0.0475 | 0.0264 | 0.008714 | 0 | 0.05837336 | 0.1818543 | 4.42E-05 | 0.463825 | 0.006417 | 0 |
| 87  | 0.0527 | 0.0315 | 0.0086   | 0 | 0.05805114 | 0.1818543 | 4.42E-05 | 0.463825 | 0.006417 | 0 |
| 88  | 0.0591 | 0.0379 | 0.008546 | 0 | 0.05780725 | 0.1818543 | 4.42E-05 | 0.463825 | 0.006417 | 0 |
| 89  | 0.0665 | 0.0452 | 0.008549 | 0 | 0.05761557 | 0.1818543 | 4.42E-05 | 0.463825 | 0.006417 | 0 |
| 90  | 0.0747 | 0.0534 | 0.0086   | 0 | 0.05745    | 0.187765  | 4.7E-05  | 0.455913 | 0.006157 | 0 |
| 91  | 0.0747 | 0.0534 | 0.008692 | 0 | 0.05745    | 0.187765  | 4.7E-05  | 0.455913 | 0.006157 | 0 |
| 92  | 0.0747 | 0.0534 | 0.008816 | 0 | 0.05745    | 0.187765  | 4.7E-05  | 0.455913 | 0.006157 | 0 |
| 93  | 0.0747 | 0.0534 | 0.008964 | 0 | 0.05745    | 0.187765  | 4.7E-05  | 0.455913 | 0.006157 | 0 |
| 94  | 0.0747 | 0.0534 | 0.009128 | 0 | 0.05745    | 0.187765  | 4.7E-05  | 0.455913 | 0.006157 | 0 |
| 95  | 0.0747 | 0.0534 | 0.0093   | 0 | 0.05745    | 0.187765  | 4.7E-05  | 0.455913 | 0.006157 | 0 |
| 96  | 0.0747 | 0.0534 | 0.0093   | 0 | 0.05745    | 0.187765  | 4.7E-05  | 0.455913 | 0.006157 | 0 |
| 97  | 0.0747 | 0.0534 | 0.0093   | 0 | 0.05745    | 0.187765  | 4.7E-05  | 0.455913 | 0.006157 | 0 |
| 98  | 0.0747 | 0.0534 | 0.0093   | 0 | 0.05745    | 0.187765  | 4.7E-05  | 0.455913 | 0.006157 | 0 |
| 99  | 0.0747 | 0.0534 | 0.0093   | 0 | 0.05745    | 0.187765  | 4.7E-05  | 0.455913 | 0.006157 | 0 |
| 100 | 0.0747 | 0.0534 | 0.0093   | 0 | 0.05745    | 0.187765  | 4.7E-05  | 0.455913 | 0.006157 | 0 |
| 101 | 0.0747 | 0.0534 | 0.0093   | 0 | 0.05745    | 0.187765  | 4.7E-05  | 0.455913 | 0.006157 | 0 |
| 102 | 0.0747 | 0.0534 | 0.0093   | 0 | 0.05745    | 0.187765  | 4.7E-05  | 0.455913 | 0.006157 | 0 |
| 103 | 0.0747 | 0.0534 | 0.0093   | 0 | 0.05745    | 0.187765  | 4.7E-05  | 0.455913 | 0.006157 | 0 |
| 104 | 0.0747 | 0.0534 | 0.0093   | 0 | 0.05745    | 0.187765  | 4.7E-05  | 0.455913 | 0.006157 | 0 |
| 105 | 0.0747 | 0.0534 | 0.0093   | 0 | 0.05745    | 0.187765  | 4.7E-05  | 0.455913 | 0.006157 | 0 |

|     |  |  |  |  |  |                              |  |  |  |  |
|-----|--|--|--|--|--|------------------------------|--|--|--|--|
| 106 |  |  |  |  |  | From Indigenous BOD (remote) |  |  |  |  |
|-----|--|--|--|--|--|------------------------------|--|--|--|--|

| 107 | Case fatality                           |                                         |                      |                |                       | Prevalence (initial)                    |                                         |                      |                |                       |
|-----|-----------------------------------------|-----------------------------------------|----------------------|----------------|-----------------------|-----------------------------------------|-----------------------------------------|----------------------|----------------|-----------------------|
| 108 | I20-I25:<br>Ischaemic heart<br>diseases | I60-I69:<br>Cerebrovascular<br>diseases | E11,E14:<br>Diabetes | C50:<br>Breast | C18-20:<br>Colorectum | I20-I25:<br>Ischaemic heart<br>diseases | I60-I69:<br>Cerebrovascular<br>diseases | E11,E14:<br>Diabetes | C50:<br>Breast | C18-20:<br>Colorectum |
| 109 | 0.0000                                  | 0.0000                                  | 0.0069               | 0              | 0                     | 0                                       | 8.52E-09                                | 0.000122             | 0              | 0                     |
| 110 | 0.0000                                  | 0.0000                                  | 0.006483             | 0              | 0                     | 0                                       | 4.4E-08                                 | 0.000793             | 0              | 0                     |
| 111 | 0.0000                                  | 0.0000                                  | 0.006                | 5.2E-05        | 1.1072E-07            | 0                                       | 4.4E-08                                 | 0.000793             | 0              | 0                     |
| 112 | 0.0000                                  | 0.0000                                  | 0.005404             | 8.33E-05       | 1.7716E-07            | 0                                       | 4.4E-08                                 | 0.000793             | 0              | 0                     |
| 113 | 0.0000                                  | 0.0000                                  | 0.004716             | 7.29E-05       | 1.5501E-07            | 0                                       | 4.4E-08                                 | 0.000793             | 0              | 0                     |
| 114 | 0.0000                                  | 0.0000                                  | 0.003977             | 0              | 0                     | 0                                       | 6.07E-08                                | 0.00235              | 1.34E-06       | 0                     |
| 115 | 0.0000                                  | 0.0001                                  | 0.003225             | 0              | 0                     | 0                                       | 6.07E-08                                | 0.00235              | 1.34E-06       | 0                     |
| 116 | 0.0000                                  | 0.0001                                  | 0.0025               | 0              | 0                     | 0                                       | 6.07E-08                                | 0.00235              | 1.34E-06       | 0                     |
| 117 | 0.0000                                  | 0.0002                                  | 0.001837             | 9.05E-05       | 0                     | 0                                       | 6.07E-08                                | 0.00235              | 1.34E-06       | 0                     |

|     | K      | L      | M        | N        | O          | P         | Q        | R        | S        | T        |
|-----|--------|--------|----------|----------|------------|-----------|----------|----------|----------|----------|
| 118 | 0.0000 | 0.0002 | 0.001254 | 0.000782 | 0          | 0         | 6.07E-08 | 0.00235  | 1.34E-06 | 0        |
| 119 | 0.0000 | 0.0003 | 0.000761 | 0.0021   | 0          | 2.5E-06   | 8.75E-08 | 0.004184 | 9.99E-07 | 0        |
| 120 | 0.0000 | 0.0004 | 0.000373 | 0.00416  | 1.1338E-06 | 2.5E-06   | 8.75E-08 | 0.004184 | 9.99E-07 | 0        |
| 121 | 0.0000 | 0.0005 | 0.0001   | 0.006832 | 2.303E-06  | 2.5E-06   | 8.75E-08 | 0.004184 | 9.99E-07 | 0        |
| 122 | 0.0000 | 0.0006 | -5.1E-05 | 0.009924 | 2.9054E-06 | 2.5E-06   | 8.75E-08 | 0.004184 | 9.99E-07 | 0        |
| 123 | 0.0000 | 0.0006 | -0.00011 | 0.013244 | 2.3385E-06 | 2.5E-06   | 8.75E-08 | 0.004184 | 9.99E-07 | 0        |
| 124 | 0.0000 | 0.0007 | -9.5E-05 | 0.0166   | 0          | 7E-05     | 1.3E-07  | 0.008475 | 9.36E-06 | 0        |
| 125 | 0.0000 | 0.0007 | -4.9E-05 | 0.019822 | 0          | 7E-05     | 1.3E-07  | 0.008475 | 9.36E-06 | 0        |
| 126 | 0.0000 | 0.0007 | 0        | 0.022825 | 0          | 7E-05     | 1.3E-07  | 0.008475 | 9.36E-06 | 0        |
| 127 | 0.0000 | 0.0007 | 2.7E-05  | 0.025547 | 0          | 7E-05     | 1.3E-07  | 0.008475 | 9.36E-06 | 0        |
| 128 | 0.0000 | 0.0006 | 3.32E-05 | 0.027927 | 0          | 7E-05     | 1.3E-07  | 0.008475 | 9.36E-06 | 0        |
| 129 | 0.0000 | 0.0006 | 2.58E-05 | 0.0299   | 0          | 0.000578  | 6.94E-07 | 0.022906 | 1.64E-05 | 7.46E-06 |
| 130 | 0.0000 | 0.0006 | 1.23E-05 | 0.031496 | 1.5816E-05 | 0.000578  | 6.94E-07 | 0.022906 | 1.64E-05 | 7.46E-06 |
| 131 | 0.0000 | 0.0006 | 0        | 0.033104 | 3.2108E-05 | 0.000578  | 6.94E-07 | 0.022906 | 1.64E-05 | 7.46E-06 |
| 132 | 0.0000 | 0.0006 | -4.6E-06 | 0.035203 | 4.0491E-05 | 0.000578  | 6.94E-07 | 0.022906 | 1.64E-05 | 7.46E-06 |
| 133 | 0.0000 | 0.0008 | 1.28E-06 | 0.038276 | 3.2583E-05 | 0.000578  | 6.94E-07 | 0.022906 | 1.64E-05 | 7.46E-06 |
| 134 | 0.0000 | 0.0010 | 1.94E-05 | 0.0428   | 0          | 0.0024139 | 5.83E-07 | 0.054635 | 2.32E-05 | 4.12E-05 |
| 135 | 0.0000 | 0.0014 | 5.17E-05 | 0.048989 | 0          | 0.0024139 | 5.83E-07 | 0.054635 | 2.32E-05 | 4.12E-05 |
| 136 | 0.0000 | 0.0020 | 0.0001   | 0.055982 | 0          | 0.0024139 | 5.83E-07 | 0.054635 | 2.32E-05 | 4.12E-05 |
| 137 | 0.0000 | 0.0028 | 0.000165 | 0.06265  | 0          | 0.0024139 | 5.83E-07 | 0.054635 | 2.32E-05 | 4.12E-05 |
| 138 | 0.0000 | 0.0037 | 0.000243 | 0.067866 | 0          | 0.0024139 | 5.83E-07 | 0.054635 | 2.32E-05 | 4.12E-05 |
| 139 | 0.0000 | 0.0047 | 0.000328 | 0.0705   | 0          | 0.007066  | 9.09E-07 | 0.107171 | 4.82E-05 | 0.000154 |
| 140 | 0.0000 | 0.0056 | 0.000415 | 0.069762 | 0.0003115  | 0.007066  | 9.09E-07 | 0.107171 | 4.82E-05 | 0.000154 |
| 141 | 0.0000 | 0.0063 | 0.0005   | 0.066208 | 0.00117681 | 0.007066  | 9.09E-07 | 0.107171 | 4.82E-05 | 0.000154 |
| 142 | 0.0000 | 0.0067 | 0.000579 | 0.060733 | 0.00302637 | 0.007066  | 9.09E-07 | 0.107171 | 4.82E-05 | 0.000154 |
| 143 | 0.0000 | 0.0070 | 0.000653 | 0.054232 | 0.00629062 | 0.007066  | 9.09E-07 | 0.107171 | 4.82E-05 | 0.000154 |
| 144 | 0.0000 | 0.0070 | 0.000729 | 0.0476   | 0.0114     | 0.0171846 | 1.81E-06 | 0.176967 | 0.000104 | 0.00043  |
| 145 | 0.0000 | 0.0068 | 0.00081  | 0.041596 | 0.01860344 | 0.0171846 | 1.81E-06 | 0.176967 | 0.000104 | 0.00043  |
| 146 | 0.0000 | 0.0066 | 0.0009   | 0.036445 | 0.02742381 | 0.0171846 | 1.81E-06 | 0.176967 | 0.000104 | 0.00043  |
| 147 | 0.0000 | 0.0063 | 0.001003 | 0.032235 | 0.03720245 | 0.0171846 | 1.81E-06 | 0.176967 | 0.000104 | 0.00043  |
| 148 | 0.0000 | 0.0060 | 0.001116 | 0.029057 | 0.04728073 | 0.0171846 | 1.81E-06 | 0.176967 | 0.000104 | 0.00043  |
| 149 | 0.0000 | 0.0056 | 0.001239 | 0.027    | 0.057      | 0.0358209 | 2.78E-06 | 0.253971 | 0.000198 | 0.00095  |
| 150 | 0.0000 | 0.0053 | 0.001368 | 0.026102 | 0.06578034 | 0.0358209 | 2.78E-06 | 0.253971 | 0.000198 | 0.00095  |
| 151 | 0.0000 | 0.0050 | 0.0015   | 0.026194 | 0.07335677 | 0.0358209 | 2.78E-06 | 0.253971 | 0.000198 | 0.00095  |
| 152 | 0.0000 | 0.0048 | 0.001635 | 0.027054 | 0.07954303 | 0.0358209 | 2.78E-06 | 0.253971 | 0.000198 | 0.00095  |
| 153 | 0.0000 | 0.0046 | 0.001777 | 0.028463 | 0.08415286 | 0.0358209 | 2.78E-06 | 0.253971 | 0.000198 | 0.00095  |
| 154 | 0.0000 | 0.0045 | 0.001931 | 0.0302   | 0.087      | 0.061541  | 4.05E-06 | 0.329188 | 0.000402 | 0.001566 |
| 155 | 0.0000 | 0.0046 | 0.002104 | 0.032084 | 0.08800239 | 0.061541  | 4.05E-06 | 0.329188 | 0.000402 | 0.001566 |
| 156 | 0.0000 | 0.0048 | 0.0023   | 0.034101 | 0.0874947  | 0.061541  | 4.05E-06 | 0.329188 | 0.000402 | 0.001566 |
| 157 | 0.0001 | 0.0052 | 0.002525 | 0.036276 | 0.08591583 | 0.061541  | 4.05E-06 | 0.329188 | 0.000402 | 0.001566 |
| 158 | 0.0002 | 0.0058 | 0.002778 | 0.038633 | 0.08370463 | 0.061541  | 4.05E-06 | 0.329188 | 0.000402 | 0.001566 |
| 159 | 0.0004 | 0.0065 | 0.003059 | 0.0412   | 0.0813     | 0.0907353 | 1.04E-05 | 0.396798 | 0.000659 | 0.00228  |
| 160 | 0.0006 | 0.0075 | 0.003367 | 0.044004 | 0.07906771 | 0.0907353 | 1.04E-05 | 0.396798 | 0.000659 | 0.00228  |
| 161 | 0.0009 | 0.0086 | 0.0037   | 0.047084 | 0.07708122 | 0.0907353 | 1.04E-05 | 0.396798 | 0.000659 | 0.00228  |
| 162 | 0.0012 | 0.0099 | 0.004059 | 0.050482 | 0.07534086 | 0.0907353 | 1.04E-05 | 0.396798 | 0.000659 | 0.00228  |
| 163 | 0.0016 | 0.0111 | 0.004451 | 0.05424  | 0.07384701 | 0.0907353 | 1.04E-05 | 0.396798 | 0.000659 | 0.00228  |
| 164 | 0.0020 | 0.0121 | 0.004883 | 0.0584   | 0.0726     | 0.1218246 | 1.44E-05 | 0.453713 | 0.001078 | 0.002968 |
| 165 | 0.0023 | 0.0127 | 0.005363 | 0.063    | 0.07159036 | 0.1218246 | 1.44E-05 | 0.453713 | 0.001078 | 0.002968 |
| 166 | 0.0026 | 0.0126 | 0.0059   | 0.068062 | 0.07076923 | 0.1218246 | 1.44E-05 | 0.453713 | 0.001078 | 0.002968 |
| 167 | 0.0028 | 0.0118 | 0.006495 | 0.073604 | 0.07007792 | 0.1218246 | 1.44E-05 | 0.453713 | 0.001078 | 0.002968 |
| 168 | 0.0030 | 0.0105 | 0.007129 | 0.079644 | 0.06945774 | 0.1218246 | 1.44E-05 | 0.453713 | 0.001078 | 0.002968 |
| 169 | 0.0032 | 0.0089 | 0.007774 | 0.0862   | 0.06885    | 0.1468557 | 2E-05    | 0.499478 | 0.001811 | 0.003505 |
| 170 | 0.0036 | 0.0074 | 0.008407 | 0.093288 | 0.06820526 | 0.1468557 | 2E-05    | 0.499478 | 0.001811 | 0.003505 |
| 171 | 0.0043 | 0.0063 | 0.009    | 0.100911 | 0.06751107 | 0.1468557 | 2E-05    | 0.499478 | 0.001811 | 0.003505 |
| 172 | 0.0053 | 0.0058 | 0.009532 | 0.10907  | 0.06676426 | 0.1468557 | 2E-05    | 0.499478 | 0.001811 | 0.003505 |
| 173 | 0.0065 | 0.0058 | 0.009993 | 0.117766 | 0.06596163 | 0.1468557 | 2E-05    | 0.499478 | 0.001811 | 0.003505 |
| 174 | 0.0079 | 0.0064 | 0.010378 | 0.127    | 0.0651     | 0.1675932 | 2.9E-05  | 0.534973 | 0.002715 | 0.003653 |
| 175 | 0.0094 | 0.0074 | 0.010682 | 0.136756 | 0.06418382 | 0.1675932 | 2.9E-05  | 0.534973 | 0.002715 | 0.003653 |
| 176 | 0.0110 | 0.0087 | 0.0109   | 0.146952 | 0.06324808 | 0.1675932 | 2.9E-05  | 0.534973 | 0.002715 | 0.003653 |
| 177 | 0.0126 | 0.0103 | 0.01103  | 0.15749  | 0.06233544 | 0.1675932 | 2.9E-05  | 0.534973 | 0.002715 | 0.003653 |
| 178 | 0.0142 | 0.0122 | 0.011087 | 0.168272 | 0.06148853 | 0.1675932 | 2.9E-05  | 0.534973 | 0.002715 | 0.003653 |
| 179 | 0.0158 | 0.0144 | 0.011088 | 0.1792   | 0.06075    | 0.1874922 | 3.66E-05 | 0.560569 | 0.003661 | 0.003567 |
| 180 | 0.0174 | 0.0169 | 0.011053 | 0.190329 | 0.06015628 | 0.1874922 | 3.66E-05 | 0.560569 | 0.003661 | 0.003567 |
| 181 | 0.0191 | 0.0198 | 0.011    | 0.202329 | 0.05971899 | 0.1874922 | 3.66E-05 | 0.560569 | 0.003661 | 0.003567 |

|     | K      | L      | M        | N        | O          | P         | Q        | R        | S        | T        |
|-----|--------|--------|----------|----------|------------|-----------|----------|----------|----------|----------|
| 182 | 0.0209 | 0.0231 | 0.010944 | 0.216025 | 0.05944357 | 0.1874922 | 3.66E-05 | 0.560569 | 0.003661 | 0.003567 |
| 183 | 0.0227 | 0.0266 | 0.010893 | 0.23224  | 0.05933543 | 0.1874922 | 3.66E-05 | 0.560569 | 0.003661 | 0.003567 |
| 184 | 0.0246 | 0.0305 | 0.010849 | 0.2518   | 0.0594     | 0.2024279 | 4.41E-05 | 0.57583  | 0.004712 | 0.003314 |
| 185 | 0.0266 | 0.0345 | 0.010817 | 0.275253 | 0.05963707 | 0.2024279 | 4.41E-05 | 0.57583  | 0.004712 | 0.003314 |
| 186 | 0.0287 | 0.0386 | 0.0108   | 0.302046 | 0.06002394 | 0.2024279 | 4.41E-05 | 0.57583  | 0.004712 | 0.003314 |
| 187 | 0.0311 | 0.0428 | 0.0108   | 0.331353 | 0.06053227 | 0.2024279 | 4.41E-05 | 0.57583  | 0.004712 | 0.003314 |
| 188 | 0.0339 | 0.0470 | 0.010811 | 0.362347 | 0.06113374 | 0.2024279 | 4.41E-05 | 0.57583  | 0.004712 | 0.003314 |
| 189 | 0.0374 | 0.0512 | 0.01082  | 0.3942   | 0.0618     | 0.2118478 | 5.18E-05 | 0.579671 | 0.005183 | 0.003001 |
| 190 | 0.0419 | 0.0553 | 0.01082  | 0.426222 | 0.06250624 | 0.2118478 | 5.18E-05 | 0.579671 | 0.005183 | 0.003001 |
| 191 | 0.0476 | 0.0593 | 0.0108   | 0.458269 | 0.06324165 | 0.2118478 | 5.18E-05 | 0.579671 | 0.005183 | 0.003001 |
| 192 | 0.0547 | 0.0632 | 0.010752 | 0.490335 | 0.06399895 | 0.2118478 | 5.18E-05 | 0.579671 | 0.005183 | 0.003001 |
| 193 | 0.0630 | 0.0669 | 0.010679 | 0.522414 | 0.06477083 | 0.2118478 | 5.18E-05 | 0.579671 | 0.005183 | 0.003001 |
| 194 | 0.0722 | 0.0706 | 0.010583 | 0.5545   | 0.06555    | 0.2137978 | 5.62E-05 | 0.577581 | 0.005128 | 0.002788 |
| 195 | 0.0722 | 0.0706 | 0.010469 | 0.5545   | 0.06555    | 0.2137978 | 5.62E-05 | 0.577581 | 0.005128 | 0.002788 |
| 196 | 0.0722 | 0.0706 | 0.01034  | 0.5545   | 0.06555    | 0.2137978 | 5.62E-05 | 0.577581 | 0.005128 | 0.002788 |
| 197 | 0.0722 | 0.0706 | 0.010199 | 0.5545   | 0.06555    | 0.2137978 | 5.62E-05 | 0.577581 | 0.005128 | 0.002788 |
| 198 | 0.0722 | 0.0706 | 0.010051 | 0.5545   | 0.06555    | 0.2137978 | 5.62E-05 | 0.577581 | 0.005128 | 0.002788 |
| 199 | 0.0722 | 0.0706 | 0.0099   | 0.5545   | 0.06555    | 0.2137978 | 5.62E-05 | 0.577581 | 0.005128 | 0.002788 |
| 200 | 0.0722 | 0.0706 | 0.0099   | 0.5545   | 0.06555    | 0.2137978 | 5.62E-05 | 0.577581 | 0.005128 | 0.002788 |
| 201 | 0.0722 | 0.0706 | 0.0099   | 0.5545   | 0.06555    | 0.2137978 | 5.62E-05 | 0.577581 | 0.005128 | 0.002788 |
| 202 | 0.0722 | 0.0706 | 0.0099   | 0.5545   | 0.06555    | 0.2137978 | 5.62E-05 | 0.577581 | 0.005128 | 0.002788 |
| 203 | 0.0722 | 0.0706 | 0.0099   | 0.5545   | 0.06555    | 0.2137978 | 5.62E-05 | 0.577581 | 0.005128 | 0.002788 |
| 204 | 0.0722 | 0.0706 | 0.0099   | 0.5545   | 0.06555    | 0.2137978 | 5.62E-05 | 0.577581 | 0.005128 | 0.002788 |
| 205 | 0.0722 | 0.0706 | 0.0099   | 0.5545   | 0.06555    | 0.2137978 | 5.62E-05 | 0.577581 | 0.005128 | 0.002788 |
| 206 | 0.0722 | 0.0706 | 0.0099   | 0.5545   | 0.06555    | 0.2137978 | 5.62E-05 | 0.577581 | 0.005128 | 0.002788 |
| 207 | 0.0722 | 0.0706 | 0.0099   | 0.5545   | 0.06555    | 0.2137978 | 5.62E-05 | 0.577581 | 0.005128 | 0.002788 |
| 208 | 0.0722 | 0.0706 | 0.0099   | 0.5545   | 0.06555    | 0.2137978 | 5.62E-05 | 0.577581 | 0.005128 | 0.002788 |
| 209 | 0.0722 | 0.0706 | 0.0099   | 0.5545   | 0.06555    | 0.2137978 | 5.62E-05 | 0.577581 | 0.005128 | 0.002788 |



|    | U                           | V                           | W                   | X              | Y                     |
|----|-----------------------------|-----------------------------|---------------------|----------------|-----------------------|
| 1  |                             |                             |                     |                |                       |
| 2  |                             |                             |                     |                |                       |
| 3  | <b>2010AUD\$ per case</b>   |                             |                     |                |                       |
| 4  | I20-I25:<br>Ischaemic heart | I60-I69:<br>Cerebrovascular | E11,E14:<br>Diabete | C50:<br>Breast | C18-20:<br>Colorectum |
| 5  | \$2,962                     | \$2,228                     | \$504               |                | \$17,490              |
| 6  | \$2,962                     | \$2,228                     | \$504               |                | \$17,490              |
| 7  | \$2,962                     | \$2,228                     | \$504               |                | \$17,490              |
| 8  | \$2,962                     | \$2,228                     | \$504               |                | \$17,490              |
| 9  | \$2,962                     | \$2,228                     | \$504               |                | \$17,490              |
| 10 | \$2,962                     | \$2,228                     | \$504               |                | \$17,490              |
| 11 | \$2,962                     | \$2,228                     | \$504               |                | \$17,490              |
| 12 | \$2,962                     | \$2,228                     | \$504               |                | \$17,490              |
| 13 | \$2,962                     | \$2,228                     | \$504               |                | \$17,490              |
| 14 | \$2,962                     | \$2,228                     | \$504               |                | \$17,490              |
| 15 | \$2,962                     | \$2,228                     | \$504               |                | \$17,490              |
| 16 | \$2,962                     | \$2,228                     | \$504               |                | \$17,490              |
| 17 | \$2,962                     | \$2,228                     | \$504               |                | \$17,490              |
| 18 | \$2,962                     | \$2,228                     | \$504               |                | \$17,490              |
| 19 | \$2,962                     | \$2,228                     | \$504               |                | \$17,490              |
| 20 | \$2,962                     | \$2,228                     | \$504               |                | \$17,490              |
| 21 | \$2,962                     | \$2,228                     | \$504               |                | \$17,490              |
| 22 | \$2,962                     | \$2,228                     | \$504               |                | \$17,490              |
| 23 | \$2,962                     | \$2,228                     | \$504               |                | \$17,490              |
| 24 | \$2,962                     | \$2,228                     | \$504               |                | \$17,490              |
| 25 | \$2,962                     | \$2,228                     | \$504               |                | \$17,490              |
| 26 | \$2,962                     | \$2,228                     | \$504               |                | \$17,490              |
| 27 | \$2,962                     | \$2,228                     | \$504               |                | \$17,490              |
| 28 | \$2,962                     | \$2,228                     | \$504               |                | \$17,490              |
| 29 | \$2,962                     | \$2,228                     | \$504               |                | \$17,490              |
| 30 | \$2,962                     | \$2,228                     | \$504               |                | \$17,490              |
| 31 | \$2,962                     | \$2,228                     | \$504               |                | \$17,490              |
| 32 | \$2,962                     | \$2,228                     | \$504               |                | \$17,490              |
| 33 | \$2,962                     | \$2,228                     | \$504               |                | \$17,490              |
| 34 | \$2,962                     | \$2,228                     | \$504               |                | \$17,490              |
| 35 | \$2,962                     | \$2,228                     | \$504               |                | \$17,490              |
| 36 | \$2,962                     | \$2,228                     | \$504               |                | \$17,490              |
| 37 | \$2,962                     | \$2,228                     | \$504               |                | \$17,490              |
| 38 | \$2,962                     | \$2,228                     | \$504               |                | \$17,490              |
| 39 | \$2,962                     | \$2,228                     | \$504               |                | \$17,490              |
| 40 | \$2,962                     | \$2,228                     | \$504               |                | \$17,490              |
| 41 | \$2,962                     | \$2,228                     | \$504               |                | \$17,490              |
| 42 | \$2,962                     | \$2,228                     | \$504               |                | \$17,490              |
| 43 | \$2,962                     | \$2,228                     | \$504               |                | \$17,490              |
| 44 | \$2,962                     | \$2,228                     | \$504               |                | \$17,490              |
| 45 | \$2,962                     | \$2,228                     | \$504               |                | \$17,490              |
| 46 | \$2,962                     | \$2,228                     | \$504               |                | \$17,490              |
| 47 | \$2,962                     | \$2,228                     | \$504               |                | \$17,490              |
| 48 | \$2,962                     | \$2,228                     | \$504               |                | \$17,490              |
| 49 | \$2,962                     | \$2,228                     | \$504               |                | \$17,490              |
| 50 | \$2,962                     | \$2,228                     | \$504               |                | \$17,490              |
| 51 | \$2,962                     | \$2,228                     | \$504               |                | \$17,490              |
| 52 | \$2,962                     | \$2,228                     | \$504               |                | \$17,490              |
| 53 | \$2,962                     | \$2,228                     | \$504               |                | \$17,490              |
| 54 | \$2,962                     | \$2,228                     | \$504               |                | \$17,490              |
| 55 | \$2,962                     | \$2,228                     | \$504               |                | \$17,490              |
| 56 | \$2,865                     | \$2,499                     | \$520               |                | \$17,507              |
| 57 | \$2,767                     | \$2,771                     | \$535               |                | \$17,523              |
| 58 | \$2,670                     | \$3,042                     | \$551               |                | \$17,540              |
| 59 | \$2,573                     | \$3,313                     | \$567               |                | \$17,557              |

|     | U                                       | V                                       | W                    | X              | Y                     |
|-----|-----------------------------------------|-----------------------------------------|----------------------|----------------|-----------------------|
| 60  | \$2,475                                 | \$3,585                                 | \$582                |                | \$17,573              |
| 61  | \$2,378                                 | \$3,856                                 | \$598                |                | \$17,590              |
| 62  | \$2,280                                 | \$4,128                                 | \$613                |                | \$17,607              |
| 63  | \$2,183                                 | \$4,399                                 | \$629                |                | \$17,623              |
| 64  | \$2,086                                 | \$4,670                                 | \$645                |                | \$17,640              |
| 65  | \$1,988                                 | \$4,942                                 | \$660                |                | \$17,657              |
| 66  | \$1,956                                 | \$5,400                                 | \$671                |                | \$17,707              |
| 67  | \$1,923                                 | \$5,859                                 | \$681                |                | \$17,758              |
| 68  | \$1,891                                 | \$6,318                                 | \$691                |                | \$17,809              |
| 69  | \$1,859                                 | \$6,776                                 | \$701                |                | \$17,860              |
| 70  | \$1,826                                 | \$7,235                                 | \$711                |                | \$17,910              |
| 71  | \$1,794                                 | \$7,694                                 | \$722                |                | \$17,961              |
| 72  | \$1,761                                 | \$8,152                                 | \$732                |                | \$18,012              |
| 73  | \$1,729                                 | \$8,611                                 | \$742                |                | \$18,063              |
| 74  | \$1,697                                 | \$9,070                                 | \$752                |                | \$18,113              |
| 75  | \$1,664                                 | \$9,529                                 | \$763                |                | \$18,164              |
| 76  | \$1,649                                 | \$9,861                                 | \$750                |                | \$18,151              |
| 77  | \$1,634                                 | \$10,194                                | \$738                |                | \$18,139              |
| 78  | \$1,619                                 | \$10,527                                | \$726                |                | \$18,126              |
| 79  | \$1,603                                 | \$10,860                                | \$713                |                | \$18,113              |
| 80  | \$1,588                                 | \$11,192                                | \$701                |                | \$18,101              |
| 81  | \$1,573                                 | \$11,525                                | \$688                |                | \$18,088              |
| 82  | \$1,558                                 | \$11,858                                | \$676                |                | \$18,075              |
| 83  | \$1,543                                 | \$12,191                                | \$664                |                | \$18,062              |
| 84  | \$1,527                                 | \$12,524                                | \$651                |                | \$18,050              |
| 85  | \$1,512                                 | \$12,856                                | \$639                |                | \$18,037              |
| 86  | \$1,500                                 | \$13,201                                | \$634                |                | \$18,162              |
| 87  | \$1,489                                 | \$13,545                                | \$630                |                | \$18,287              |
| 88  | \$1,477                                 | \$13,890                                | \$625                |                | \$18,412              |
| 89  | \$1,465                                 | \$14,234                                | \$621                |                | \$18,538              |
| 90  | \$1,453                                 | \$14,579                                | \$616                |                | \$18,663              |
| 91  | \$1,441                                 | \$14,923                                | \$612                |                | \$18,788              |
| 92  | \$1,430                                 | \$15,268                                | \$607                |                | \$18,913              |
| 93  | \$1,418                                 | \$15,612                                | \$603                |                | \$19,038              |
| 94  | \$1,406                                 | \$15,956                                | \$598                |                | \$19,163              |
| 95  | \$1,394                                 | \$16,301                                | \$594                |                | \$19,288              |
| 96  | \$1,394                                 | \$16,301                                | \$594                |                | \$19,288              |
| 97  | \$1,394                                 | \$16,301                                | \$594                |                | \$19,288              |
| 98  | \$1,394                                 | \$16,301                                | \$594                |                | \$19,288              |
| 99  | \$1,394                                 | \$16,301                                | \$594                |                | \$19,288              |
| 100 | \$1,394                                 | \$16,301                                | \$594                |                | \$19,288              |
| 101 | \$1,394                                 | \$16,301                                | \$594                |                | \$19,288              |
| 102 | \$1,394                                 | \$16,301                                | \$594                |                | \$19,288              |
| 103 | \$1,394                                 | \$16,301                                | \$594                |                | \$19,288              |
| 104 | \$1,394                                 | \$16,301                                | \$594                |                | \$19,288              |
| 105 | \$1,394                                 | \$16,301                                | \$594                |                | \$19,288              |
| 106 |                                         |                                         |                      |                |                       |
| 107 | <b>2010AUD\$ per case</b>               |                                         |                      |                |                       |
| 108 | I20-I25:<br>Ischaemic heart<br>diseases | I60-I69:<br>Cerebrovascular<br>diseases | E11,E14:<br>Diabetes | C50:<br>Breast | C18-20:<br>Colorectum |
| 109 | \$1,832                                 | \$1,161                                 | \$506                | \$12,424       | \$17,136              |
| 110 | \$1,832                                 | \$1,161                                 | \$506                | \$12,424       | \$17,136              |
| 111 | \$1,832                                 | \$1,161                                 | \$506                | \$12,424       | \$17,136              |
| 112 | \$1,832                                 | \$1,161                                 | \$506                | \$12,424       | \$17,136              |
| 113 | \$1,832                                 | \$1,161                                 | \$506                | \$12,424       | \$17,136              |
| 114 | \$1,832                                 | \$1,161                                 | \$506                | \$12,424       | \$17,136              |
| 115 | \$1,832                                 | \$1,161                                 | \$506                | \$12,424       | \$17,136              |
| 116 | \$1,832                                 | \$1,161                                 | \$506                | \$12,424       | \$17,136              |
| 117 | \$1,832                                 | \$1,161                                 | \$506                | \$12,424       | \$17,136              |

|     | U       | V       | W     | X        | Y        |
|-----|---------|---------|-------|----------|----------|
| 118 | \$1,832 | \$1,161 | \$506 | \$12,424 | \$17,136 |
| 119 | \$1,832 | \$1,161 | \$506 | \$12,424 | \$17,136 |
| 120 | \$1,832 | \$1,161 | \$506 | \$12,424 | \$17,136 |
| 121 | \$1,832 | \$1,161 | \$506 | \$12,424 | \$17,136 |
| 122 | \$1,832 | \$1,161 | \$506 | \$12,424 | \$17,136 |
| 123 | \$1,832 | \$1,161 | \$506 | \$12,424 | \$17,136 |
| 124 | \$1,832 | \$1,161 | \$506 | \$12,424 | \$17,136 |
| 125 | \$1,832 | \$1,161 | \$506 | \$12,424 | \$17,136 |
| 126 | \$1,832 | \$1,161 | \$506 | \$12,424 | \$17,136 |
| 127 | \$1,832 | \$1,161 | \$506 | \$12,424 | \$17,136 |
| 128 | \$1,832 | \$1,161 | \$506 | \$12,424 | \$17,136 |
| 129 | \$1,832 | \$1,161 | \$506 | \$12,424 | \$17,136 |
| 130 | \$1,832 | \$1,161 | \$506 | \$12,424 | \$17,136 |
| 131 | \$1,832 | \$1,161 | \$506 | \$12,424 | \$17,136 |
| 132 | \$1,832 | \$1,161 | \$506 | \$12,424 | \$17,136 |
| 133 | \$1,832 | \$1,161 | \$506 | \$12,424 | \$17,136 |
| 134 | \$1,832 | \$1,161 | \$506 | \$12,424 | \$17,136 |
| 135 | \$1,832 | \$1,161 | \$506 | \$12,424 | \$17,136 |
| 136 | \$1,832 | \$1,161 | \$506 | \$12,424 | \$17,136 |
| 137 | \$1,832 | \$1,161 | \$506 | \$12,424 | \$17,136 |
| 138 | \$1,832 | \$1,161 | \$506 | \$12,424 | \$17,136 |
| 139 | \$1,832 | \$1,161 | \$506 | \$12,424 | \$17,136 |
| 140 | \$1,832 | \$1,161 | \$506 | \$12,424 | \$17,136 |
| 141 | \$1,832 | \$1,161 | \$506 | \$12,424 | \$17,136 |
| 142 | \$1,832 | \$1,161 | \$506 | \$12,424 | \$17,136 |
| 143 | \$1,832 | \$1,161 | \$506 | \$12,424 | \$17,136 |
| 144 | \$1,832 | \$1,161 | \$506 | \$12,424 | \$17,136 |
| 145 | \$1,832 | \$1,161 | \$506 | \$12,424 | \$17,136 |
| 146 | \$1,832 | \$1,161 | \$506 | \$12,424 | \$17,136 |
| 147 | \$1,832 | \$1,161 | \$506 | \$12,424 | \$17,136 |
| 148 | \$1,832 | \$1,161 | \$506 | \$12,424 | \$17,136 |
| 149 | \$1,832 | \$1,161 | \$506 | \$12,424 | \$17,136 |
| 150 | \$1,832 | \$1,161 | \$506 | \$12,424 | \$17,136 |
| 151 | \$1,832 | \$1,161 | \$506 | \$12,424 | \$17,136 |
| 152 | \$1,832 | \$1,161 | \$506 | \$12,424 | \$17,136 |
| 153 | \$1,832 | \$1,161 | \$506 | \$12,424 | \$17,136 |
| 154 | \$1,832 | \$1,161 | \$506 | \$12,424 | \$17,136 |
| 155 | \$1,832 | \$1,161 | \$506 | \$12,424 | \$17,136 |
| 156 | \$1,832 | \$1,161 | \$506 | \$12,424 | \$17,136 |
| 157 | \$1,832 | \$1,161 | \$506 | \$12,424 | \$17,136 |
| 158 | \$1,832 | \$1,161 | \$506 | \$12,424 | \$17,136 |
| 159 | \$1,832 | \$1,161 | \$506 | \$12,424 | \$17,136 |
| 160 | \$1,800 | \$1,254 | \$531 | \$12,231 | \$17,058 |
| 161 | \$1,769 | \$1,347 | \$556 | \$12,038 | \$16,979 |
| 162 | \$1,738 | \$1,440 | \$582 | \$11,845 | \$16,900 |
| 163 | \$1,707 | \$1,533 | \$607 | \$11,652 | \$16,822 |
| 164 | \$1,676 | \$1,626 | \$632 | \$11,459 | \$16,743 |
| 165 | \$1,645 | \$1,719 | \$658 | \$11,266 | \$16,664 |
| 166 | \$1,614 | \$1,812 | \$683 | \$11,073 | \$16,585 |
| 167 | \$1,582 | \$1,904 | \$708 | \$10,880 | \$16,507 |
| 168 | \$1,551 | \$1,997 | \$734 | \$10,687 | \$16,428 |
| 169 | \$1,520 | \$2,090 | \$759 | \$10,493 | \$16,349 |
| 170 | \$1,528 | \$2,392 | \$767 | \$10,605 | \$16,438 |
| 171 | \$1,535 | \$2,693 | \$775 | \$10,717 | \$16,527 |
| 172 | \$1,542 | \$2,995 | \$783 | \$10,828 | \$16,616 |
| 173 | \$1,550 | \$3,297 | \$791 | \$10,940 | \$16,705 |
| 174 | \$1,557 | \$3,598 | \$799 | \$11,051 | \$16,794 |
| 175 | \$1,565 | \$3,900 | \$807 | \$11,163 | \$16,883 |
| 176 | \$1,572 | \$4,201 | \$815 | \$11,274 | \$16,972 |
| 177 | \$1,580 | \$4,503 | \$823 | \$11,386 | \$17,061 |
| 178 | \$1,587 | \$4,805 | \$831 | \$11,497 | \$17,149 |
| 179 | \$1,595 | \$5,106 | \$839 | \$11,609 | \$17,238 |
| 180 | \$1,592 | \$5,909 | \$830 | \$11,719 | \$17,250 |
| 181 | \$1,589 | \$6,712 | \$820 | \$11,828 | \$17,263 |

|     | U       | V        | W     | X        | Y        |
|-----|---------|----------|-------|----------|----------|
| 182 | \$1,586 | \$7,515  | \$811 | \$11,938 | \$17,275 |
| 183 | \$1,582 | \$8,318  | \$801 | \$12,048 | \$17,287 |
| 184 | \$1,579 | \$9,121  | \$792 | \$12,157 | \$17,299 |
| 185 | \$1,576 | \$9,924  | \$782 | \$12,267 | \$17,311 |
| 186 | \$1,573 | \$10,727 | \$773 | \$12,377 | \$17,323 |
| 187 | \$1,570 | \$11,530 | \$763 | \$12,486 | \$17,336 |
| 188 | \$1,567 | \$12,333 | \$754 | \$12,596 | \$17,348 |
| 189 | \$1,564 | \$13,137 | \$745 | \$12,706 | \$17,360 |
| 190 | \$1,575 | \$13,791 | \$713 | \$12,687 | \$17,278 |
| 191 | \$1,585 | \$14,445 | \$681 | \$12,669 | \$17,197 |
| 192 | \$1,596 | \$15,099 | \$650 | \$12,650 | \$17,116 |
| 193 | \$1,606 | \$15,753 | \$618 | \$12,632 | \$17,034 |
| 194 | \$1,617 | \$16,408 | \$587 | \$12,613 | \$16,953 |
| 195 | \$1,628 | \$17,062 | \$555 | \$12,594 | \$16,871 |
| 196 | \$1,638 | \$17,716 | \$523 | \$12,576 | \$16,790 |
| 197 | \$1,649 | \$18,370 | \$492 | \$12,557 | \$16,708 |
| 198 | \$1,660 | \$19,024 | \$460 | \$12,539 | \$16,627 |
| 199 | \$1,670 | \$19,679 | \$429 | \$12,520 | \$16,545 |
| 200 | \$1,670 | \$19,679 | \$429 | \$12,520 | \$16,545 |
| 201 | \$1,670 | \$19,679 | \$429 | \$12,520 | \$16,545 |
| 202 | \$1,670 | \$19,679 | \$429 | \$12,520 | \$16,545 |
| 203 | \$1,670 | \$19,679 | \$429 | \$12,520 | \$16,545 |
| 204 | \$1,670 | \$19,679 | \$429 | \$12,520 | \$16,545 |
| 205 | \$1,670 | \$19,679 | \$429 | \$12,520 | \$16,545 |
| 206 | \$1,670 | \$19,679 | \$429 | \$12,520 | \$16,545 |
| 207 | \$1,670 | \$19,679 | \$429 | \$12,520 | \$16,545 |
| 208 | \$1,670 | \$19,679 | \$429 | \$12,520 | \$16,545 |
| 209 | \$1,670 | \$19,679 | \$429 | \$12,520 | \$16,545 |
